# Supplementary material
Source: Springer Nature journal article supplement (https://www.springermedizin.de/resource/supplementary/12990_2007_108_MOESM4_ESM.pdf/9612588)

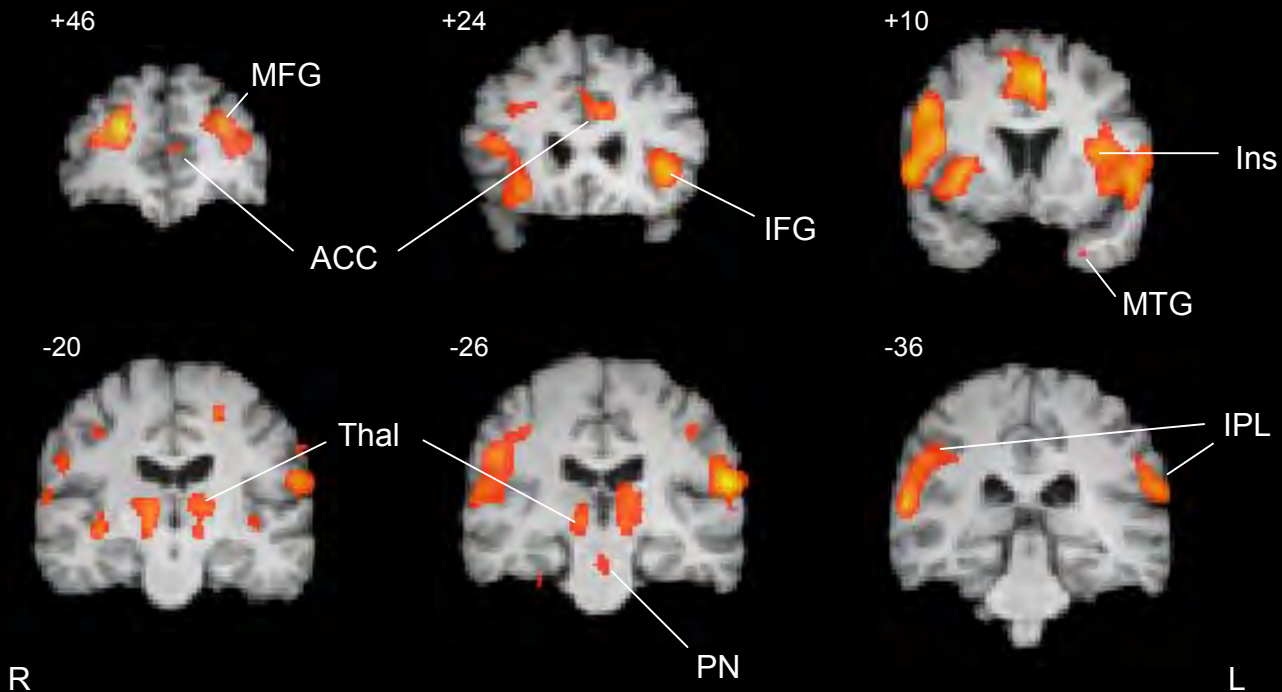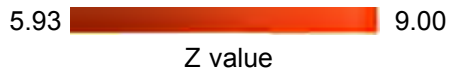

Supplement: MOESM4 [file 9612588]
